# Supplementary material for: GATA-type transcription factors play a vital role in radiation sensitivity of Cryptococcus neoformans by regulating the gene expression of specific amino acid permeases
Source: PubMed Central journal article supplement (PMC6478845; doi:10.1038/s41598-019-42778-7), 2019-04-23
Supplement: 41598_2019_42778_MOESM1_ESM.pdf [file 41598_2019_42778_MOESM1_ESM.pdf]

Title: GATA-type transcription factors play a vital role in radiation sensitivity of *Cryptococcus neoformans* by regulating the gene expression of specific amino acid permeases

Authors: Wanchang Cui, XiangHong Li, Lisa Hull, Mang Xiao.

The GATA binding sites of *AAP4* and *AAP5* genes in *Cryptococcus neoformans*:

*AAP4* gene (Genbank access number XM\_012191441) spans H99 chromosome 1 (Genbank access number CP003820) from 1533591- 1536730. There are 4 GATA binding sites within 2 kb DNA sequence upstream of *AAP4* gene as highlighted.

```
>gi|405117359|gb|CP003820.1|:1531591-1533591 Cryptococcus neoformans var.
grubii H99 chromosome 1, complete sequence
TTTCTATGCCCATCTACAGCACCTTGTTGTTTCAGAATACGGGTACTGTGGAACAGATGGCTACTGTCTGG
GAGGTTGTGAGCCACTGTGTAAGCCAACCTATAGCTATCTATGGGTGGTGTAGCTGACAGGATGCAGA
CTCCCACGAAGTCACTTCATGCCGGCCAGATCCTATCTGTACTTCCTTCAAGACAGACTTCACTGACCTT
AGCAGGGTTCAACAGAATGTATCTCTGTACGACGGTAATGCCACAGCGTACGATTGGGTGGTGAGTACG
ATGGAAAATGTCTGCTCCAGGCTGTGCTAAAACCTGTCAGTTAACACGGGATCCCTGATCGCTTCATCCG
ATAATGATGGAGCTCGTCTCATCCTAACCCAGAATAACACTGGTTCCAAAATATCTAGTACCCGTTACCT
CCATTACGGAACCTATCGACTTTACTTTGCAGACGTCAAAAATGGGCCGGTGTGGTGACAGCAGCAATCACA
ATGTCCGACGTCAAGGATGAAATAGATTGGGAATGGCTGGGGCTAATACCGATACGGTGCAGACAAACT
ATTGGTCTTTGGGTATTGCAAACGTGAAGCAGCAAGTGCCGAGATAATTAGCTGATAGCTCGGCGA
CGGAGGGTGCTTCCAGCTCGGTGTCTTCTGATACGGCTGCCACTTTTACACCTACACTGTAAATATTTAA
TGGAGTGACGTAGCGTTCGACTGACCCAATGACAGATTGACTGGCAAGAGAGTTACATCAGTTGGAGTAT
TGACGGGTTACTTGTTCGTACAGTCAGGAAGACAGATAACCATTTCTGAAGACGGGACACAGTAGTAAGCA
AGCCTCTCACTCATCTCATAACATAGCAGTACAGAACAAGGCTTGTAGATCTGACGTTTCTGCAGTAAA
TTCCCCTCCACTCCATCTCGTGTTCAAATCTCCATTTGGCCCCGCTGGCACAGACGGCAATGCTCAGGGCA
CTATCGATTGGGCGGGTGGCTACATCGATTGGACAGATAATTGACTACCTGTCCAAGGGGTATTTCTGGAA
CACCATCAAGAGTGTCAATATCAGCTGCGCATATGACACTGCTTCTTCTGGGGCGACAGGCTGGGCTTAC
TCTGGAAATGATACATCGGGGATACCGGTGAGTCCAACAATCTCATTTTCTTTTCCCTATTACTCCCTCT
CGTTCAACCGAGGCGACGACGAACAAGGAAAGTTAACGAGAGATGTTGACGTTTTATCATTTTATCTCAGA
TTGTGACCACTACCAATGCGTCAACTCTGATCTCCGCCGAAGGAAGAGAATTGTAGGAGTCGAGATCAA
TAGTCGAGGGATGGGTGGAGTGGGTCTGCTTATCATCAGTGGCTTTACATTGCTCGGAGGCGTAGCTCTC
ATCTAATCTTCTATGTCCGATGGTAACTGTACAGTGTGAAAATTACGTATCTTTGCCATCGGTCGATGG
CGTTTGATTCAAAAATAGATATGATATGAGATTTACCAAATTAGATCAATATGGGCCATTCATACTTATTA
ACCTGCTGGACGCTCGGAAAAAAGCATAACGCATATTATGAATGACGGAGAAGAGGAGGCGAGCAATATAC
TTATATAAGTATAGTATGCCGTACATAGTGCATCAATCACCTTTACAGCCTCCCCACTCTTTCCCCCAT
TCATAAAATGGTGAGCACACCATGTAAAATCATTAATTTTATTGTTTGTAGTTGATAGTGGTGGTCTA
AATGTTCAATGATCTAATAGCAGTAATGAGTGCACGTAATATCTCAGTCTGATATCAGGGTTCAGCAGCT
GTGTAGCTGGCAGCCAAATGGGGCCAACAAGTTCCGCATGGGTAATGGTGACGGGTGACGGTGAATGAGC
GAAGCGGCATCATTTGTTCTCATTCTAGTCAGCGAAAATGACAAATGTCAGAAGCTAGAAGATGTATAAA
AAATACAAGTCACATTACTGAAAACCTCACGAAGCTCCATTG
```

AAP5 gene (Genbank access number XM\_012191669) spans H99 chromosome 1 (Genbank access number CP003820) from 1424618-1422185 (Note the **minus** strand). There are 8 GATA binding sites within 2 kb DNA sequence upstream of AAP5 gene as highlighted.

```
>gi|405117359|gb|CP003820.1|:1420185-1422185 Cryptococcus neoformans var.
grubii H99 chromosome 1, complete sequence
AGATAACAGTTTTTCATGACTGGCACAAAAGCAGACTCAACCGCCTACTTCATTCTCAGCACGGTTCAGAA
ATGTCTGTAATGAGCTCACAGAAATTTTCAGTAACTGCTGGCCAAGCACGTAGCATATCTTGAAATTCACC
AAAGAAATGTTCTCTGTAGATATGCCGCGGGCAGACACAAATAGTATCAATATCAGACCCAGGGCCGTGA
ACACCGAGACTATGTACTAAGTTAGCCATTGAACTCGATATATCGAATTTACCCACCGATAAGAACCCTGA
AGTATAGATTTCGTCCACCAGCCTCTGAAGCTATTTTTTCTGACATGCCGAGTTTTATTGATACATCATGA
ACAAATTTAGCAACCAGCTGGGCGATATTTGAAAGCAATCGTTCCTCTGCATCCAAATAAGCCTTCATCTT
CGTTTTTCCAGCTCAACGCAACATAACCGAACCTTCCTTTCTTGATCAGATTTCGAATTGATTCAGGGCCAC
AAGGTCCGCCATCAAAGCTTCACTAGACTTGATATCATTGGGCTTTGGAGGATCAGTCGTAATGGGAGGT
GTAACACCCAAGAAGCTTGACAGGCGGGTTACTGTTGTTCACTATCGTTAGTCTACACCAGGAATTGCCGC
TTCCAGACGGAATGACCAGCAATAGCACGCACGAAGTCATTGGTGTTTTTCTGACAGATAGGAAGAACAAC
TCGGGGCTTGGAGTAAGACAGTCGAAATGAAGTTCGGTAATCGCAAGAGCCCAGTCGTGAAATAATTTGG
TATTCGGTGCTCAAATCTTTGCAGCTACGTCAATTAGGTGCTGTACATCAATTGCTGATTCTTGATTAT
GAAGAAATGTAGAGATCAAGAAGCAACTAGAGATACGATACGTAAAGCACAAAGAACACCTTAGACGCTG
TTGTATCCTCGGTGGCAGTCGGAGTTATCCGCTGTGGCACTAATAATATGCAGCCGTGCTGGAGTCTCCT
CACCAGAGGAAAGGAGGCAAAACAATAGTTGTTTCGTACCTTTTTAAGCATGATCCATTATACAAATTTGA
CGCCACTTATGTGTACGTGAGGGCCCGTTGTCCCTAGCGGACATCCACAGAGCTTTTTCTGCGCTCGTCC
TCTCTCTCACCTCCACGAAGACTGACGGGGCCCGCCACCCGGCAACTAATAATAAAAAGAAGCGCTCACC
GTACGCGCAGTAGAATTATCGTCCACCTTGTGCTCCCTTTTACCTGTAAGCCAAGCGGATCGCCCTTTGA
GCTAATTTCTGGAGATTTATGATAAGCTCCTAGGAAAGAGGAAATGAGCAACCGGTTGATGCGAGGAGTAA
AAGCCGATGAGGACGAAGAAGAGAGGTGCGCCGAGCCGGATGTGTTGTTGTGAGGTTTGGGAAGGTGCG
AATTCCTCCGACTAAACAACATTCATCACTGCGGCCAGCGGCAAGCTTCCATCGTTTTACAATCCATTAAT
ACGTGACTATATATTTCTAAAACATAAGAGTTACTTTTTACTAAAACCTGTTCTACTCCCAACCTAATCTA
ATCTTCCCTATCTTCATTCTTCGTCCATCTCTTCATTTCTTCCCTGTTTTCTCTTACAATCCGACTTCCGT
TTGAGACGACCAGGAATTTAAATCAATCCCTCCCCCACGGAACAATAAGAAGCGGCGCTGGCCATGTG
AGCCCTGCTGCCCTCTTCTGCAGCGACCTGAGACACCAGCGTAGGACAAGGTGCGCAGGATGACTTCCCCG
ATTCTCGCTTGTGGCCGTAGTGTGGAGCGGGAGTTGTGCTGATGGACAGAGTTGTAAGACATTAGGTCA
ATGGACTTGTGCGTAAGTGCATGGTTCCTACTGCGCAATATCATAATTGGCATCTCACTAGGCCATTACT
AGGATGCATAGGTATATCTCATTCTGTGGACGCACGCCATTTTGGGCTCCTCCGATTAAGATACCTCA
TTAACCGACGCAGGCTCCTGAGTTTGGGTGCTTCGCGCTGC
```
